# Supplementary material
Source: PubMed Central journal article supplement (PMC5312697)
Supplement: NIHMS846348-supplement-Legend-for-SupFig1.pdf [file NIHMS846348-supplement-Legend-for-SupFig1.pdf]

**Supplemental Fig. 1.** *Isl1*<sup>Cre</sup>; mTmG expression and fate map at E10.5. All panels show a coronal frozen section through the pharyngeal region of E10.5 embryo stained to detect GFP (green), tdTomato (blue) and VEGFR2 (red). Pharyngeal arch arteries are numbered. Solid arrows point to the pharyngeal endoderm, arrowheads point to the surface ectoderm, dotted arrows point to the arch core mesoderm in the 3<sup>rd</sup> pharyngeal arches, and the dashed double-headed arrow points to the paired dorsal aorta (dAo). Anterior (A)–posterior (P) axis is marked. NT–neural tube. All scale bars are 100  $\mu$ m.
